# Supplementary material for: Tumor Apolipoprotein E is a key checkpoint blocking anti-tumor immunity in mouse melanoma
Source: Frontiers journal article supplement (doi:10.3389/fimmu.2022.991790), 2022-10-19

Supplement Figure 1

**A**

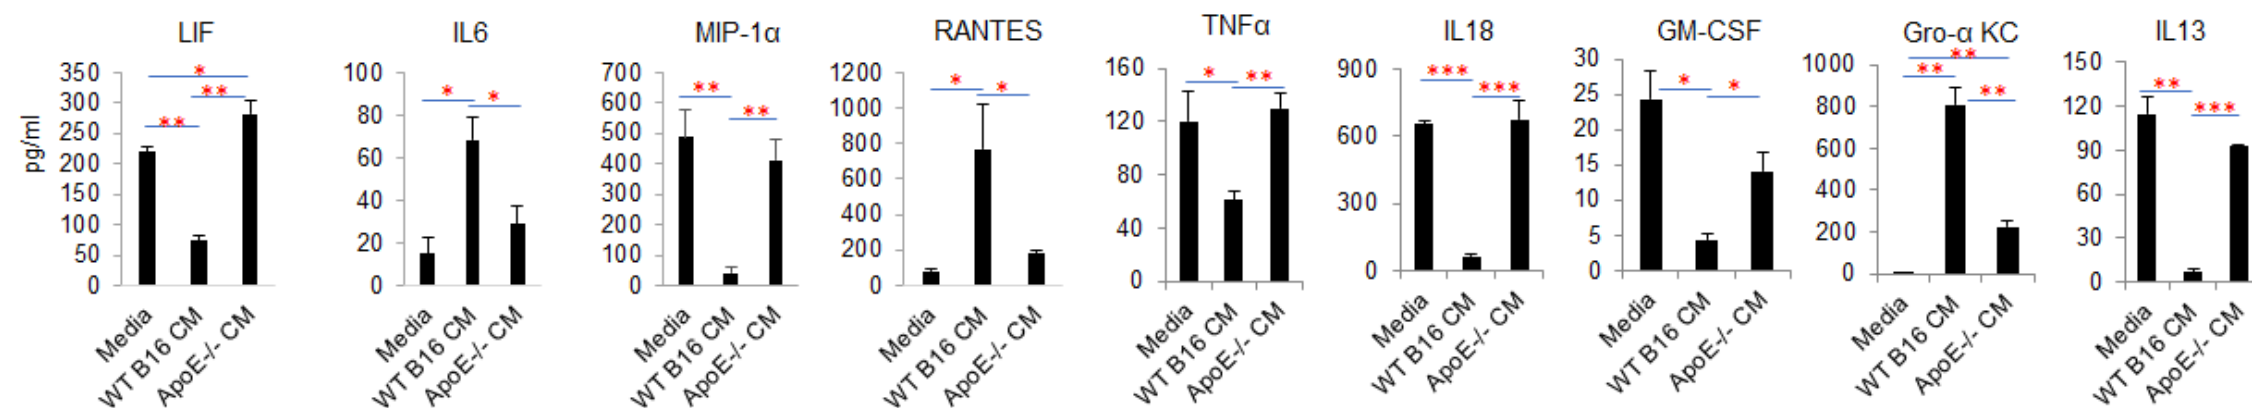

**B**

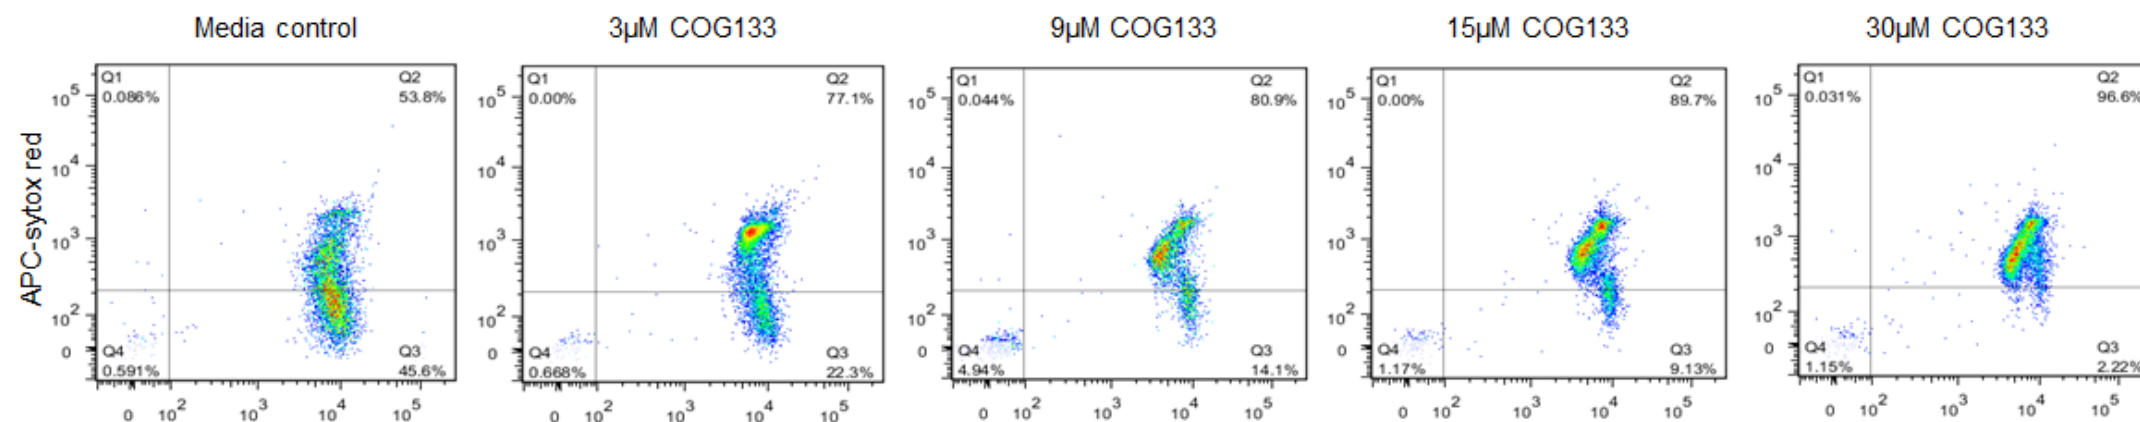

Supplement Figure 2

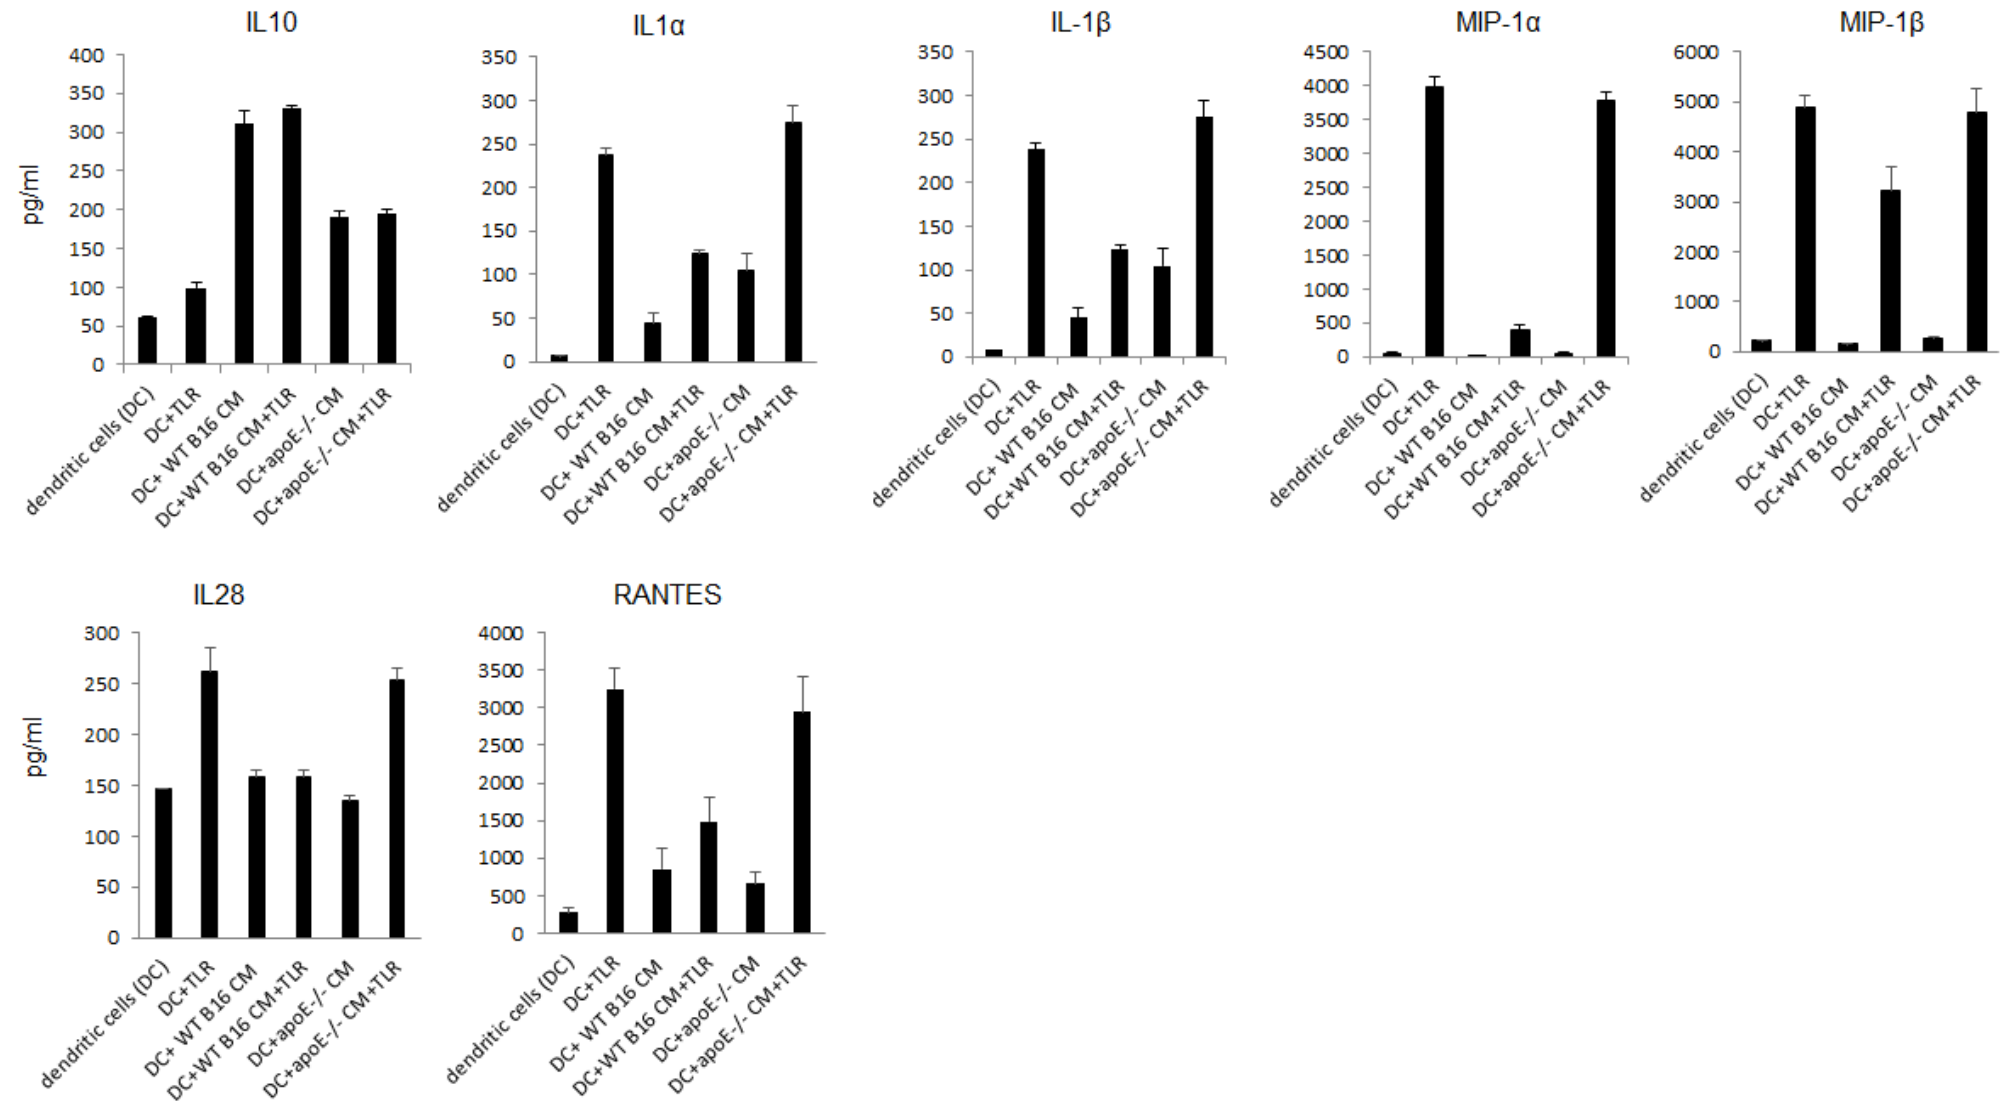

Supplement Figure 3

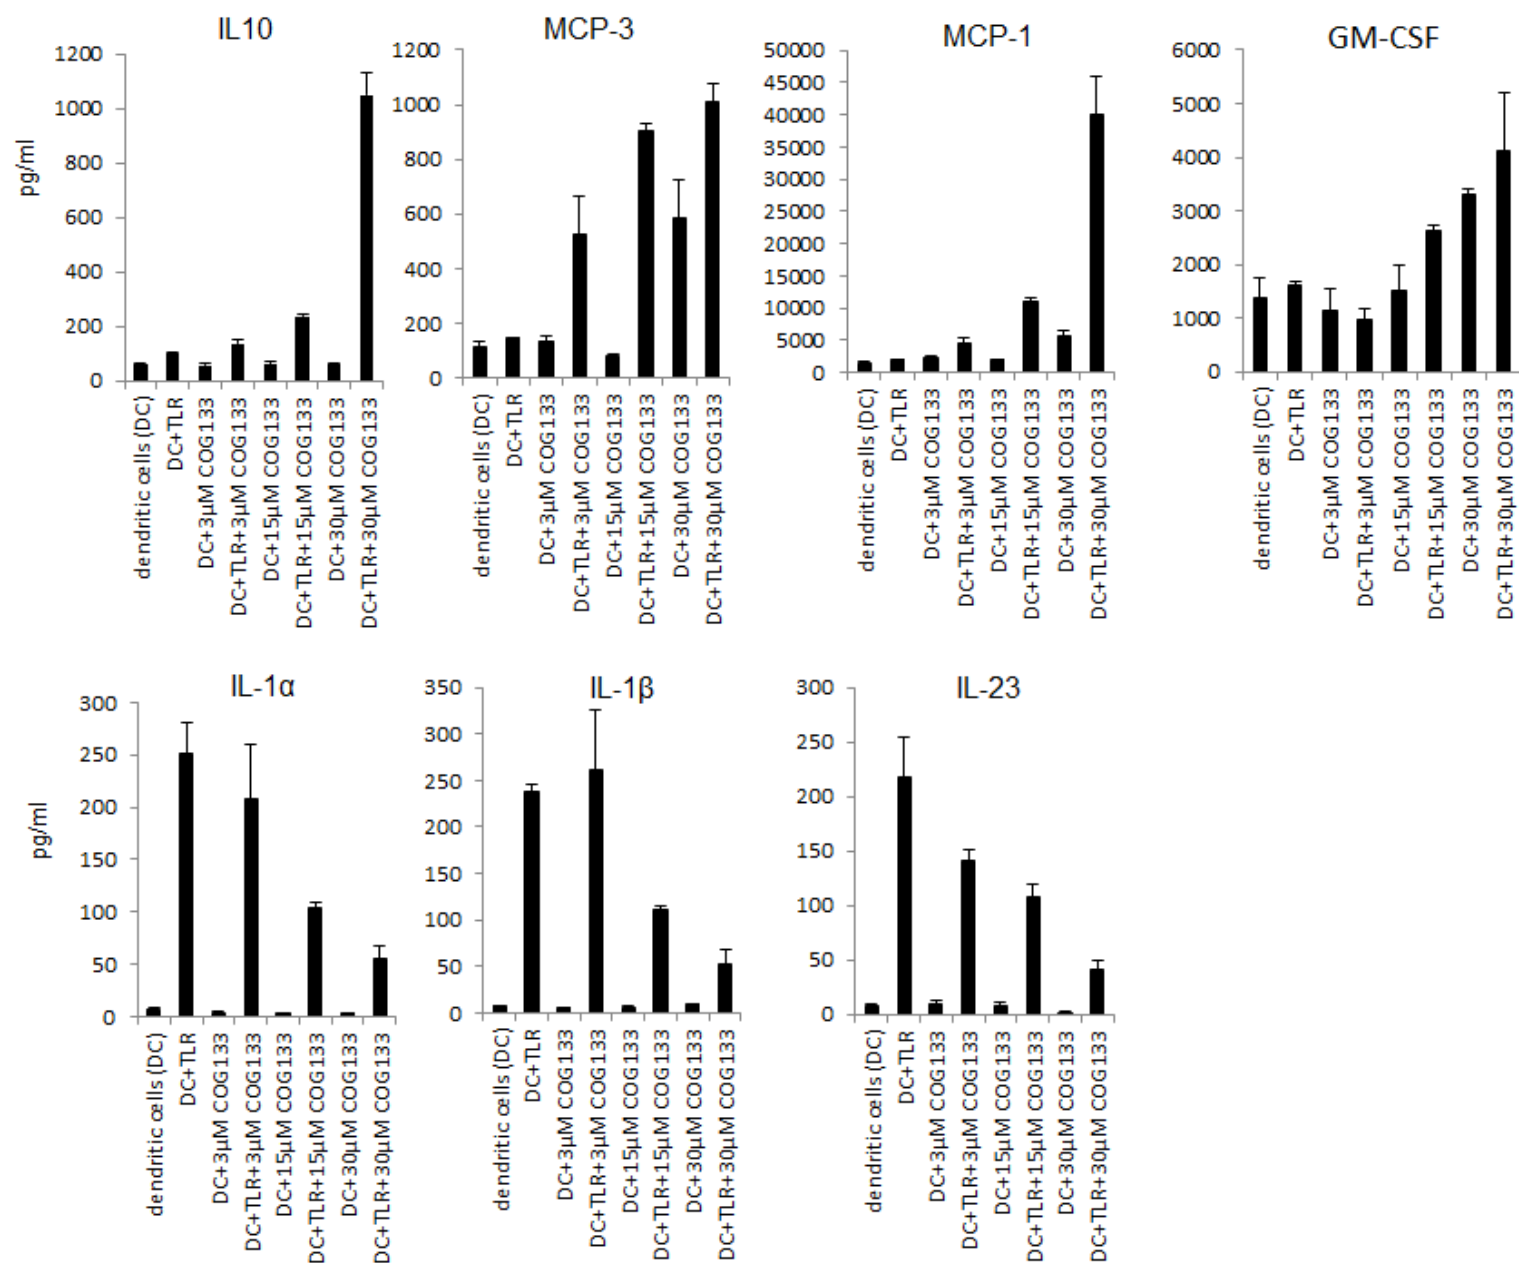

Supplement Figure 4

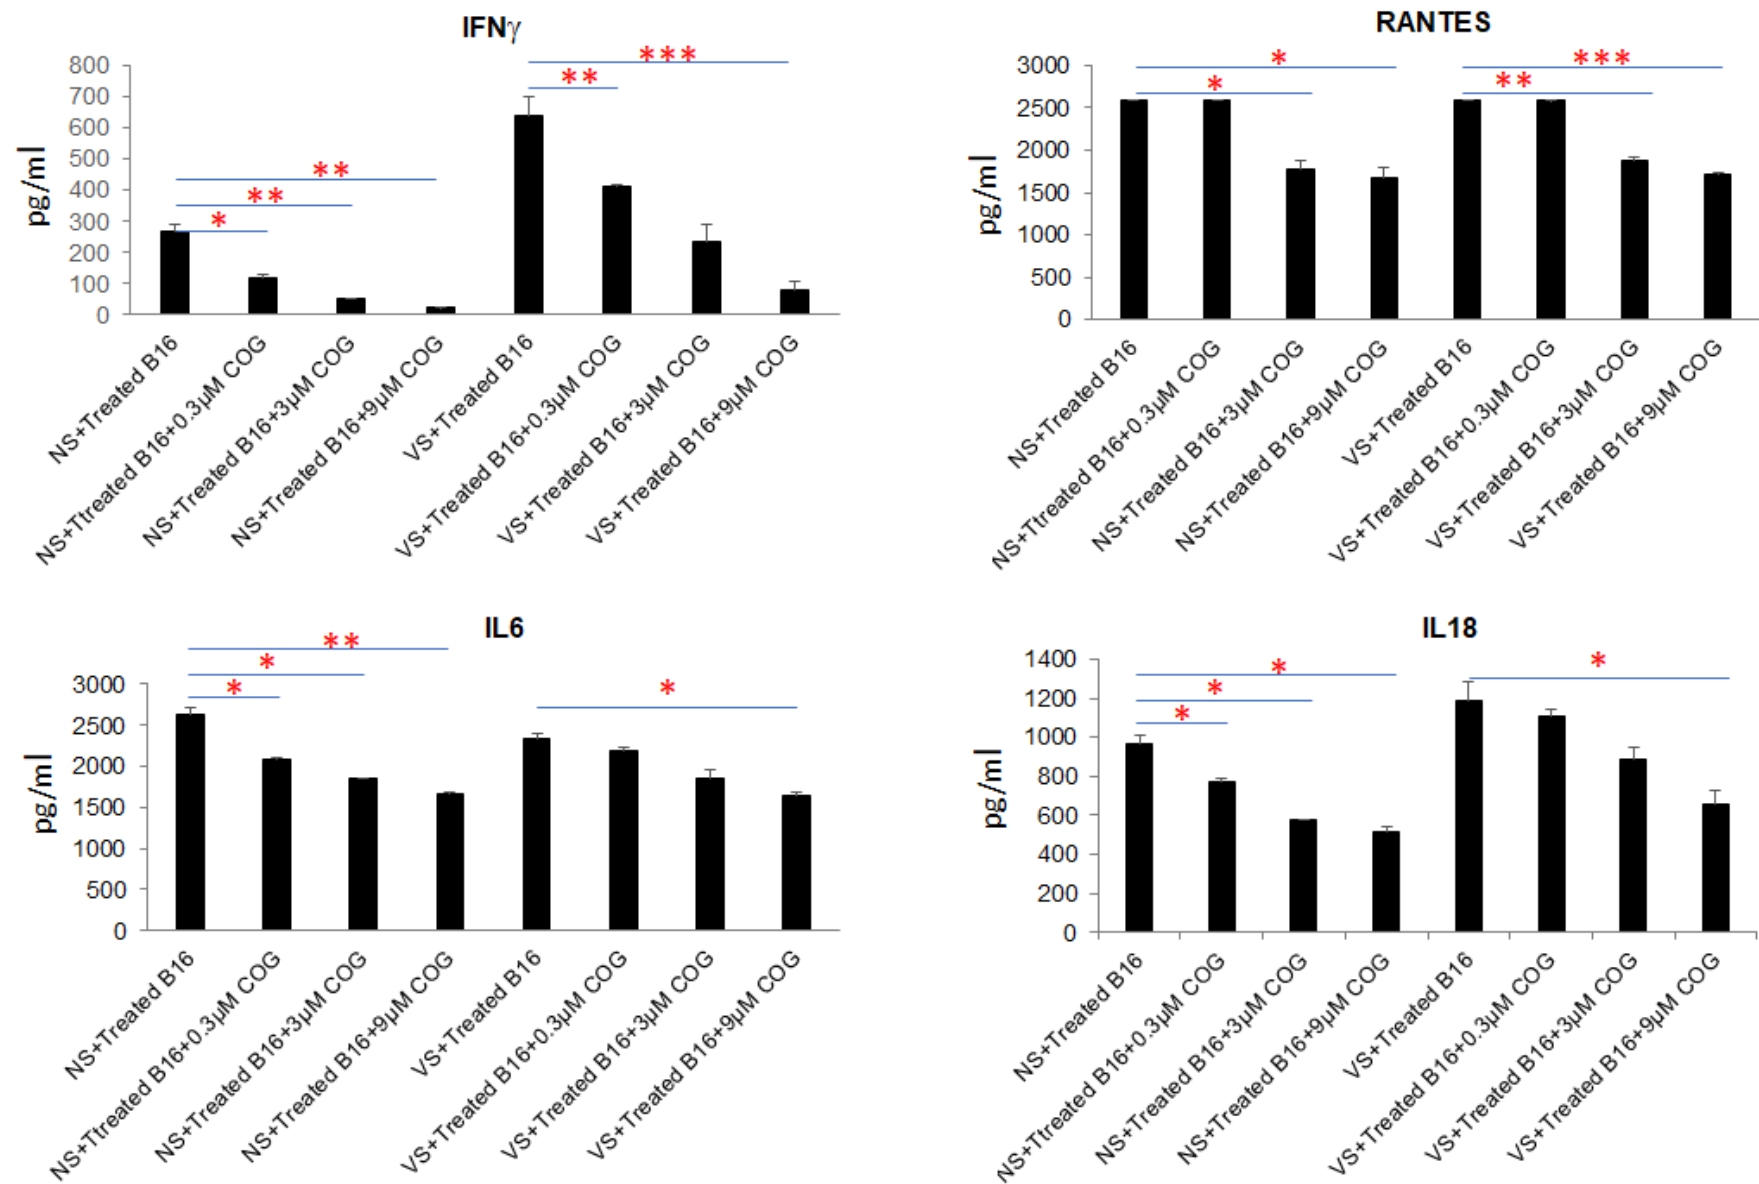

Supplement Figure 5

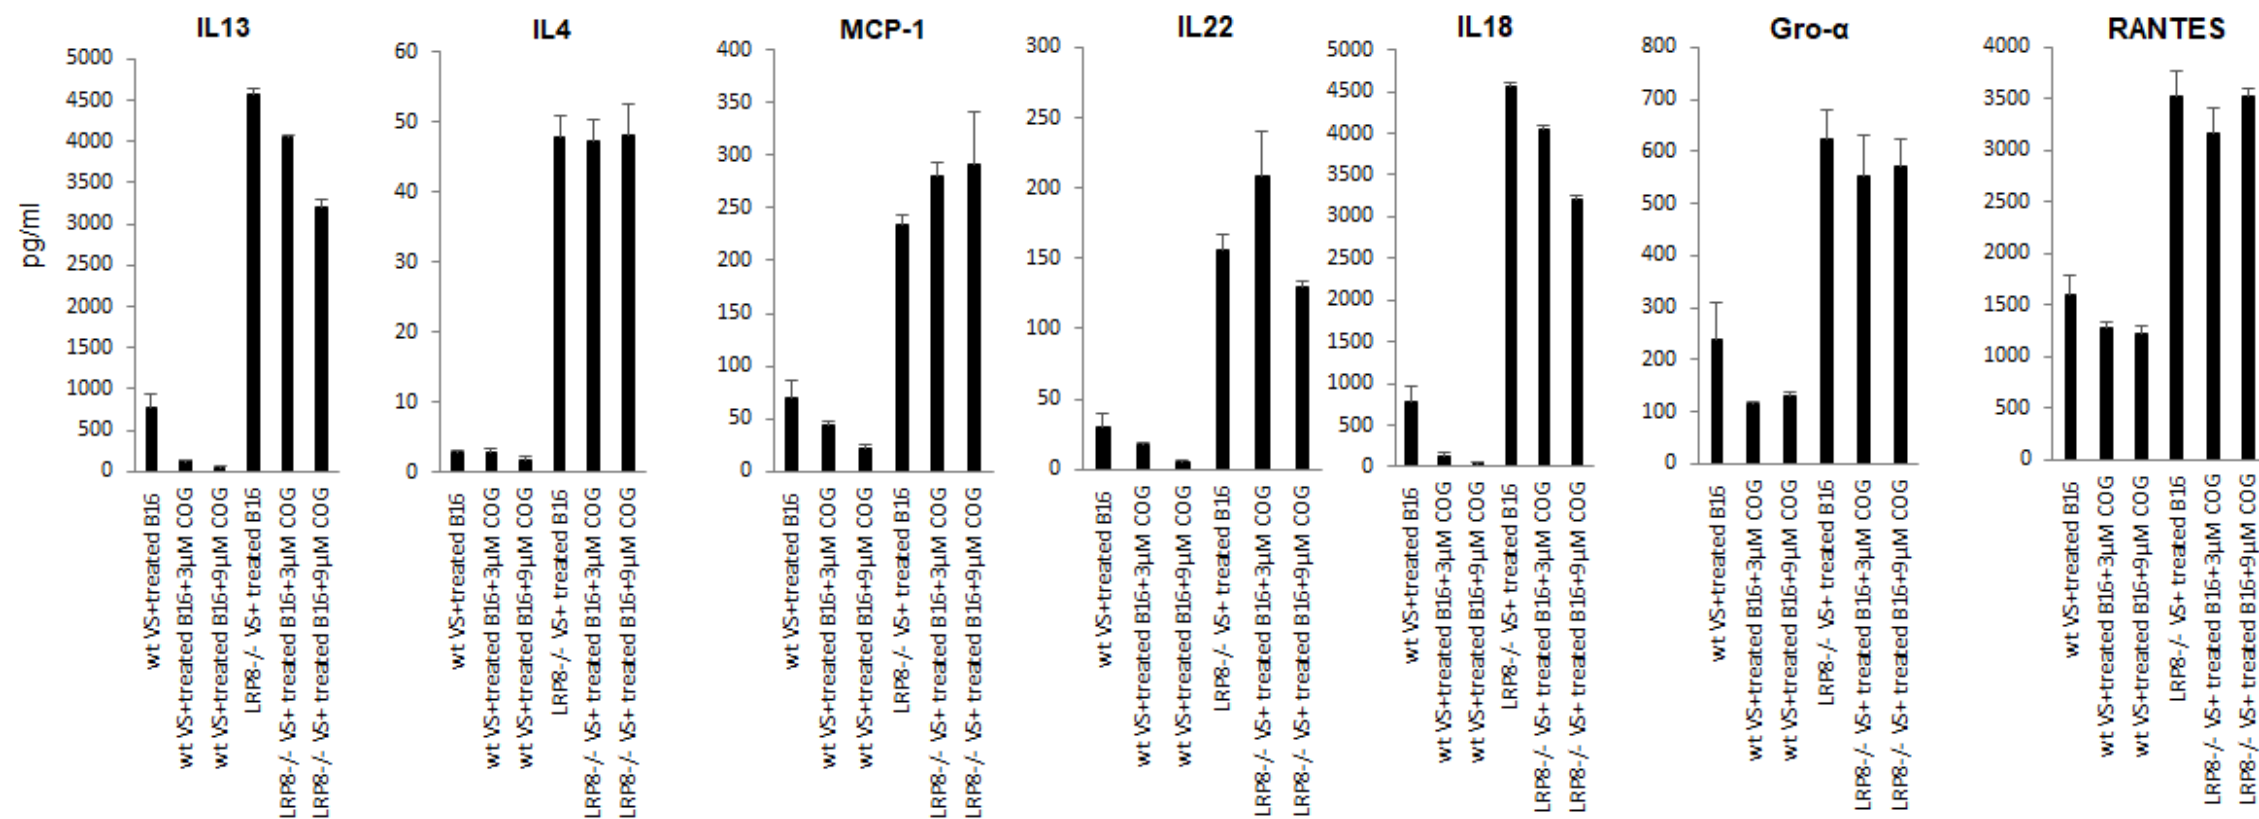

Supplement: Data_Sheet_1.PDF [file Data_Sheet_1.PDF]
